# Supplementary material for: Acta Plane: A New Reference for Virtual Orientation of Cone Beam Computed Tomography Scans
Source: Preprints.org preprint supplement (doi:10.20944/preprints202311.0989.v1), 2023-11-15
Supplement: Supplementary file 1 [file supplementary]

**Declaration of interests**

The authors declare that they have no known competing financial interests or personal relationships that could have appeared to influence the work reported in this paper.

The authors declare the following financial interests/personal relationships which may be considered as potential competing interests:
